# Supplementary material for: Measurements of atmospheric ethene by solar absorption FTIR spectrometry
Source: Copernicus journal article supplement (doi:10.5194/acp-18-5075-2018), 2018-04-16
Supplement: Supplementary file 1 [file acp-18-5075-2018-supplement.pdf]

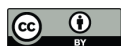

*Supplement of*

## **Measurements of atmospheric ethene by solar absorption FTIR spectrometry**

**Geoffrey C. Toon et al.**

*Correspondence to:* Geoffrey C. Toon ([geoffrey.c.toon@jpl.nasa.gov](mailto:geoffrey.c.toon@jpl.nasa.gov))

The copyright of individual parts of the supplement might differ from the CC BY 3.0 License.

| Location                       | Key | Nobs | Nday | Latitude (deg.) | Longitude (deg.) | Altitude (km) | Terrain  | Observation Season & Time |
|--------------------------------|-----|------|------|-----------------|------------------|---------------|----------|---------------------------|
| Esrang, Sweden                 | ESN | 160  | 57   | +67.889         | +21.085          | 0.271         | Boreal   | Winter, Noon              |
| Fairbanks, Alaska              | FAI | 124  | 47   | +64.830         | -147.614         | 0.182         | Boreal   | Spring & Summer, Noon     |
| Lynn Lake, Manitoba, Canada    | LYL | 20   | 11   | +56.858         | -101.066         | 0.354         | Boreal   | Summer, Noon              |
| Mt. Barcroft, California       | MTB | 1369 | 258  | +37.584         | -118.235         | 3.801         | Mountain | Year-round, Morning       |
| Mountain View, California      | ARC | 7    | 4    | +37.430         | -122.080         | 0.010         | Urban    | Various, Noon             |
| Daggett, California            | DAG | 33   | 21   | +34.856         | -116.790         | 0.626         | Desert   | Spring, Noon              |
| Ft Sumner, New Mexico          | FTS | 216  | 89   | +34.480         | -104.220         | 1.260         | Steppe   | Spring & Fall, Afternoon  |
| TMF, Wrightwood, California    | TMF | 475  | 45   | +34.382         | -117.678         | 2.257         | Mountain | Fall & Winter, Noon       |
| JPL B183, Pasadena, California | JPL | 1709 | 648  | +34.199         | -118.174         | 0.345         | Urban    | Year-round, Noon          |
| JPL Mesa, Pasadena, California | JPL | 20   | 5    | +34.205         | -118.171         | 0.460         | Urban    | Summer, Noon              |
| CSBF, Palestine, Texas         | PAL | 4    | 3    | +31.780         | -95.700          | 0.100         | Rural    | Summer, Noon              |
| McMurdo, Antarctica            | MCM | 37   | 20   | -77.847         | +166.728         | 0.100         | Icy      | Spring, Noon              |

**Table SI.1.** Summarizing the twelve observation sites from which the JPL MkIV instrument has made ground-based observations as of the end of 2016. For each site, the latitude, longitude, and altitude are listed, together with the type of surrounding terrain, the season, and time of day when observations were typically made. The number of observations ( $N_{obs}$ ) and observation days ( $N_{day}$ ) from each site are also provided. JPL has the most observation days with  $648+5=653$ , followed by Mt. Barcroft (258), and Ft. Sumner (89).

| Year       | ESN | FAI | LYL | MTB | ARC | DAG | FTS | TMF | JPL | PAL | MCM | Year Total |
|------------|-----|-----|-----|-----|-----|-----|-----|-----|-----|-----|-----|------------|
| 1985       | 0   | 0   | 0   | 0   | 0   | 0   | 0   | 0   | 5   | 0   | 0   | 5          |
| 1986       | 0   | 0   | 0   | 0   | 0   | 0   | 0   | 1   | 3   | 0   | 20  | 24         |
| 1987       | 0   | 0   | 0   | 0   | 0   | 0   | 0   | 0   | 4   | 0   | 0   | 4          |
| 1988       | 0   | 0   | 0   | 0   | 0   | 0   | 0   | 2   | 5   | 0   | 0   | 7          |
| 1989       | 0   | 0   | 0   | 0   | 0   | 0   | 7   | 0   | 10  | 3   | 0   | 20         |
| 1990       | 0   | 0   | 0   | 0   | 0   | 0   | 7   | 0   | 13  | 0   | 0   | 20         |
| 1991       | 0   | 0   | 0   | 0   | 4   | 0   | 7   | 0   | 40  | 0   | 0   | 51         |
| 1992       | 0   | 0   | 0   | 0   | 0   | 0   | 11  | 0   | 32  | 0   | 0   | 43         |
| 1993       | 0   | 0   | 0   | 0   | 0   | 21  | 10  | 0   | 33  | 0   | 0   | 64         |
| 1994       | 0   | 0   | 0   | 3   | 0   | 0   | 5   | 0   | 47  | 0   | 0   | 55         |
| 1995       | 0   | 0   | 0   | 0   | 0   | 0   | 0   | 0   | 72  | 0   | 0   | 72         |
| 1996       | 0   | 0   | 11  | 0   | 0   | 0   | 6   | 6   | 30  | 0   | 0   | 53         |
| 1997       | 0   | 47  | 0   | 0   | 0   | 0   | 0   | 0   | 18  | 0   | 0   | 65         |
| 1998       | 0   | 0   | 0   | 14  | 0   | 0   | 0   | 24  | 8   | 0   | 0   | 46         |
| 1999       | 1   | 0   | 0   | 33  | 0   | 0   | 0   | 0   | 16  | 0   | 0   | 50         |
| 2000       | 21  | 0   | 0   | 29  | 0   | 0   | 0   | 0   | 26  | 0   | 0   | 76         |
| 2001       | 0   | 0   | 0   | 101 | 0   | 0   | 0   | 0   | 0   | 0   | 0   | 101        |
| 2002       | 0   | 0   | 0   | 78  | 0   | 0   | 0   | 0   | 6   | 0   | 0   | 84         |
| 2003       | 24  | 0   | 0   | 0   | 0   | 0   | 5   | 0   | 6   | 0   | 0   | 35         |
| 2004       | 0   | 0   | 0   | 0   | 0   | 0   | 4   | 0   | 9   | 0   | 0   | 13         |
| 2005       | 0   | 0   | 0   | 0   | 0   | 0   | 4   | 0   | 2   | 0   | 0   | 6          |
| 2006       | 3   | 0   | 0   | 0   | 0   | 0   | 0   | 0   | 13  | 0   | 0   | 16         |
| 2007       | 8   | 0   | 0   | 0   | 0   | 0   | 5   | 0   | 1   | 0   | 0   | 14         |
| 2008       | 0   | 0   | 0   | 0   | 0   | 0   | 0   | 0   | 0   | 0   | 0   | 0          |
| 2009       | 0   | 0   | 0   | 0   | 0   | 0   | 0   | 11  | 1   | 0   | 0   | 12         |
| 2010       | 0   | 0   | 0   | 0   | 0   | 0   | 0   | 0   | 4   | 0   | 0   | 4          |
| 2011       | 0   | 0   | 0   | 0   | 0   | 0   | 5   | 0   | 20  | 0   | 0   | 25         |
| 2012       | 0   | 0   | 0   | 0   | 0   | 0   | 0   | 0   | 18  | 0   | 0   | 18         |
| 2013       | 0   | 0   | 0   | 0   | 0   | 0   | 0   | 0   | 74  | 0   | 0   | 74         |
| 2014       | 0   | 0   | 0   | 0   | 0   | 0   | 7   | 0   | 50  | 0   | 0   | 57         |
| 2015       | 0   | 0   | 0   | 0   | 0   | 0   | 0   | 0   | 51  | 0   | 0   | 51         |
| 2016       | 0   | 0   | 0   | 0   | 0   | 0   | 6   | 0   | 36  | 0   | 0   | 42         |
| Site Total | 57  | 47  | 11  | 258 | 4   | 21  | 89  | 45  | 653 | 3   | 20  | 1208       |

**Table SI.2.** *MkIV ground-based observation days at the 12 different sites, broken down by year. 2001 was the year with the most observations days (101) all from Mt. Barcroft. JPL is the site with the most total observation days (653).*

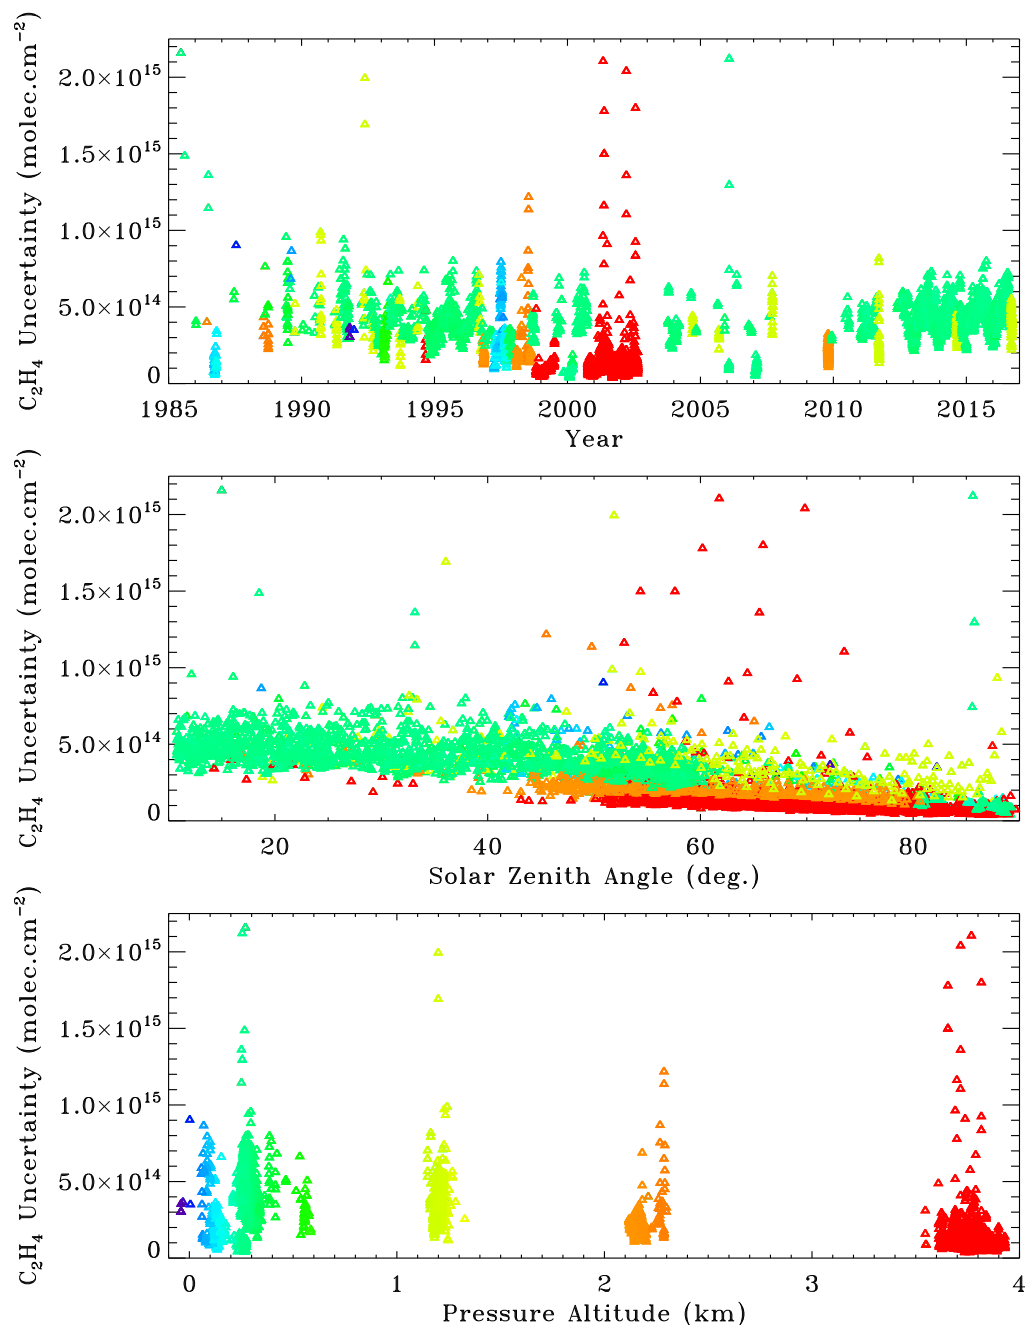

**Figure SI.3.**  $C_2H_4$  retrieval uncertainties, color-coded by pressure altitude, plotted versus year (top), solar zenith angle (middle), and pressure altitude (bottom). At any given site, ethene uncertainties decrease with solar zenith angle as the absorption features deepen (middle panel). In absolute terms the uncertainties are smallest at the highest altitude sites (lower panel), where ethene is virtually never detectable. In fractional terms, ethene uncertainties are smallest at the low altitude polluted sites.
